# Supplementary material for: CARD8 inflammasome activation during HIV-1 cell-to-cell transmission
Source: eLife journal article supplement (doi:10.7554/elife.102676), 2024-11-07
Supplement: fig3-data1 [file elife-102676-fig3-data1-v1.pdf]

**Figure 3C: Cell-to-cell HIV infection induces CARD8-dependent inflammasome activation in monocyte-derived macrophages**

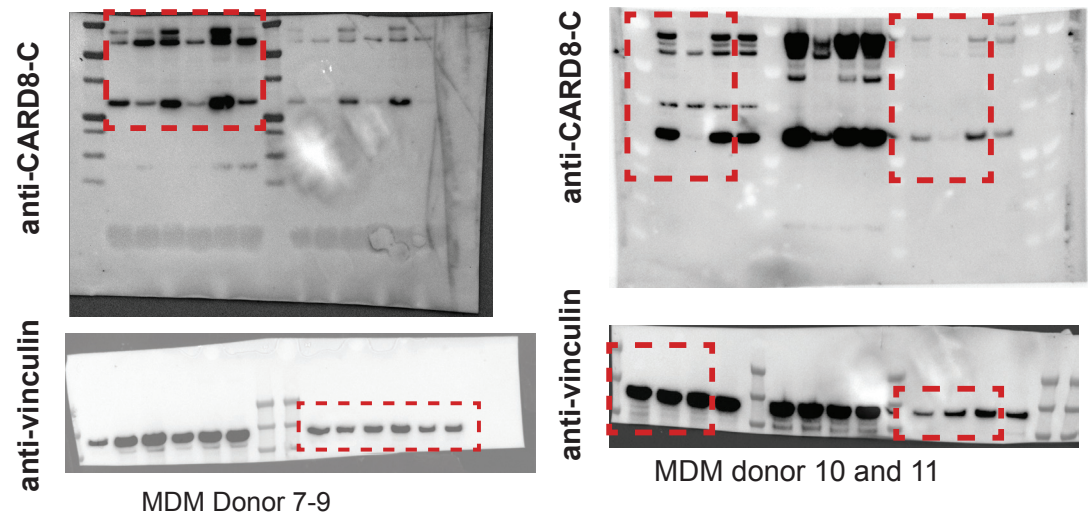

**Uncropped Western Blots:**  
Multichannel images shown are a merge of chemiluminescent and colorimetric images. Dashed red box indicates lanes used for figure
