# Supplementary material for: CARD8 inflammasome activation during HIV-1 cell-to-cell transmission
Source: eLife journal article supplement (doi:10.7554/elife.102676), 2024-11-07

**Figure 4C: Primary CD4+ T cell:MDM coculture elicits CARD8-dependent inflammasome activation**

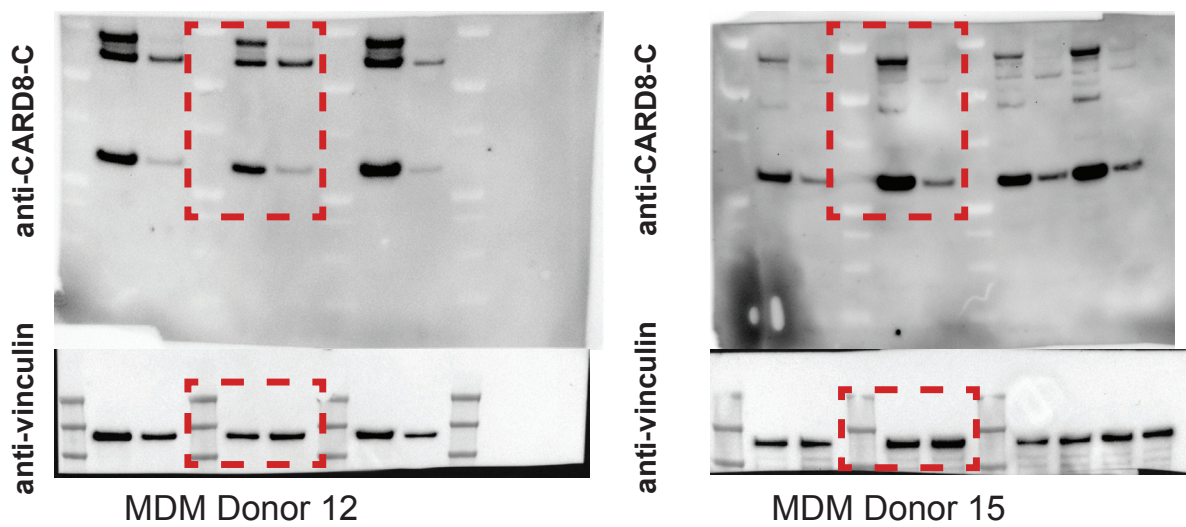

Supplement: fig4-data1 [file elife-102676-fig4-data1-v1.pdf]
