# Supplementary material for: CARD8 inflammasome activation during HIV-1 cell-to-cell transmission
Source: eLife journal article supplement (doi:10.7554/elife.102676), 2024-11-07

Figure 5A: Protease inhibitor resistant strains of HIV-1 differentially cleave and activate CARD8

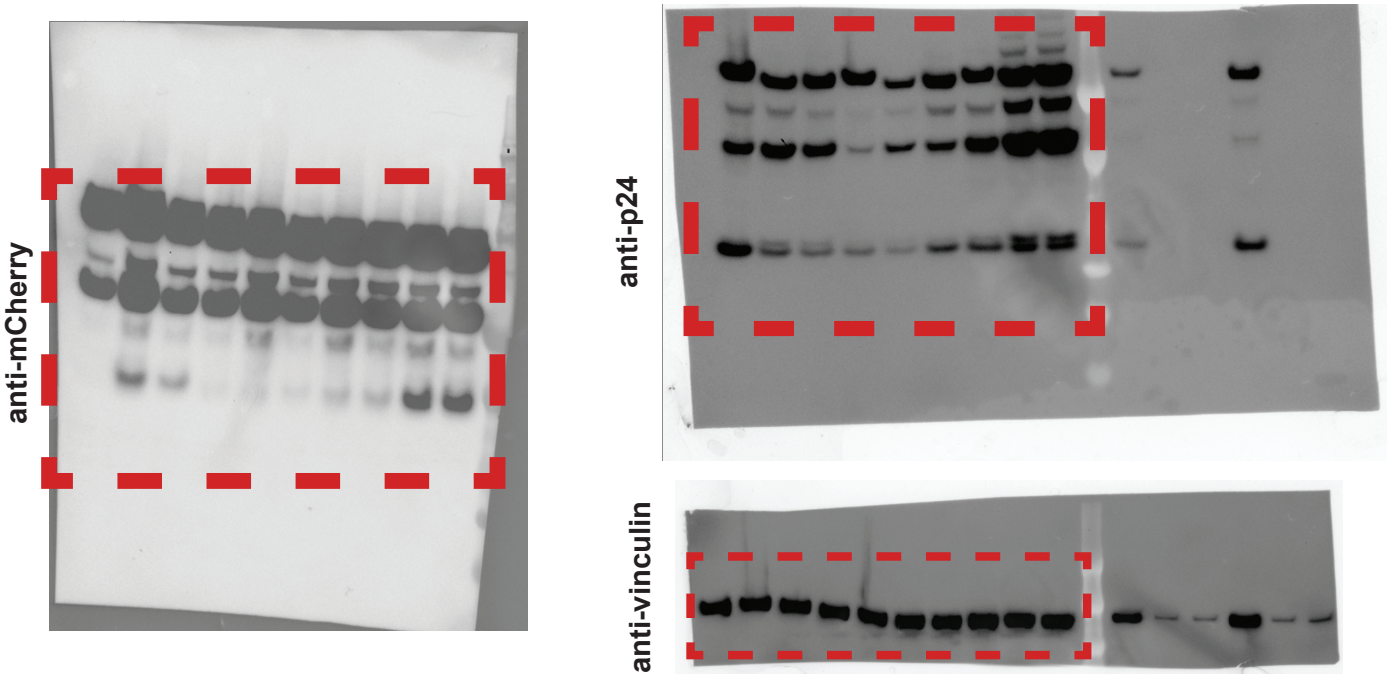

Supplement: fig5-data1 [file elife-102676-fig5-data1-v1.pdf]
